# Supplementary material for: The contribution of shipping to air pollution in the Mediterranean region – a multimodel evaluation: Comparison of photooxidants NO 2 and O 3
Source: Copernicus journal article supplement (doi:10.5194/egusphere-2022-415), 2022-07-07
Supplement: Supplementary file 1 [file egusphere-2022-415-supplement.pdf]

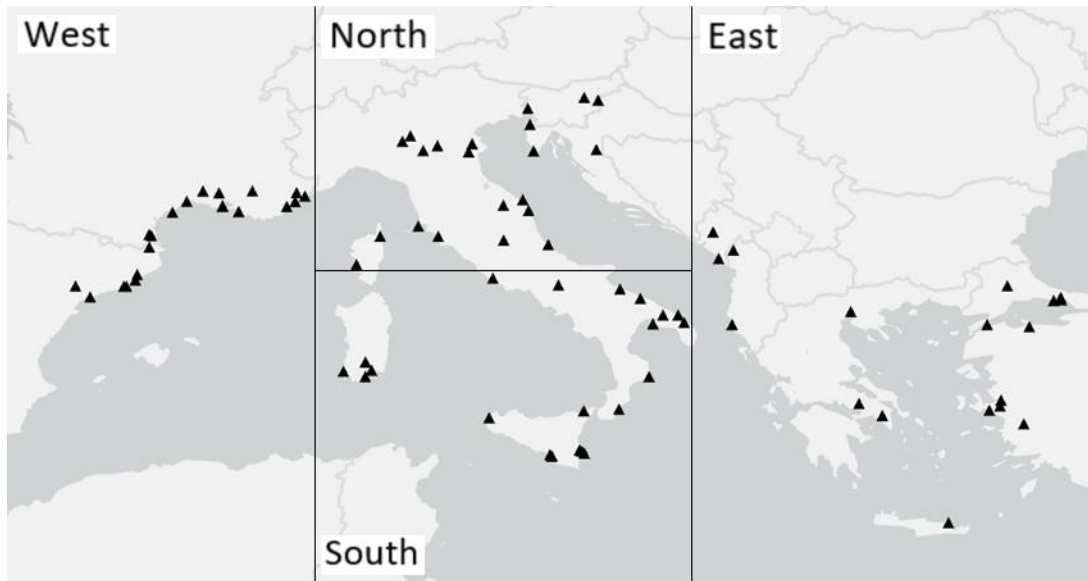

**Figure S1:** Timeseries display mean values of all stations in the respective region and the mean value of each model in this region in the grid cells of the stations.

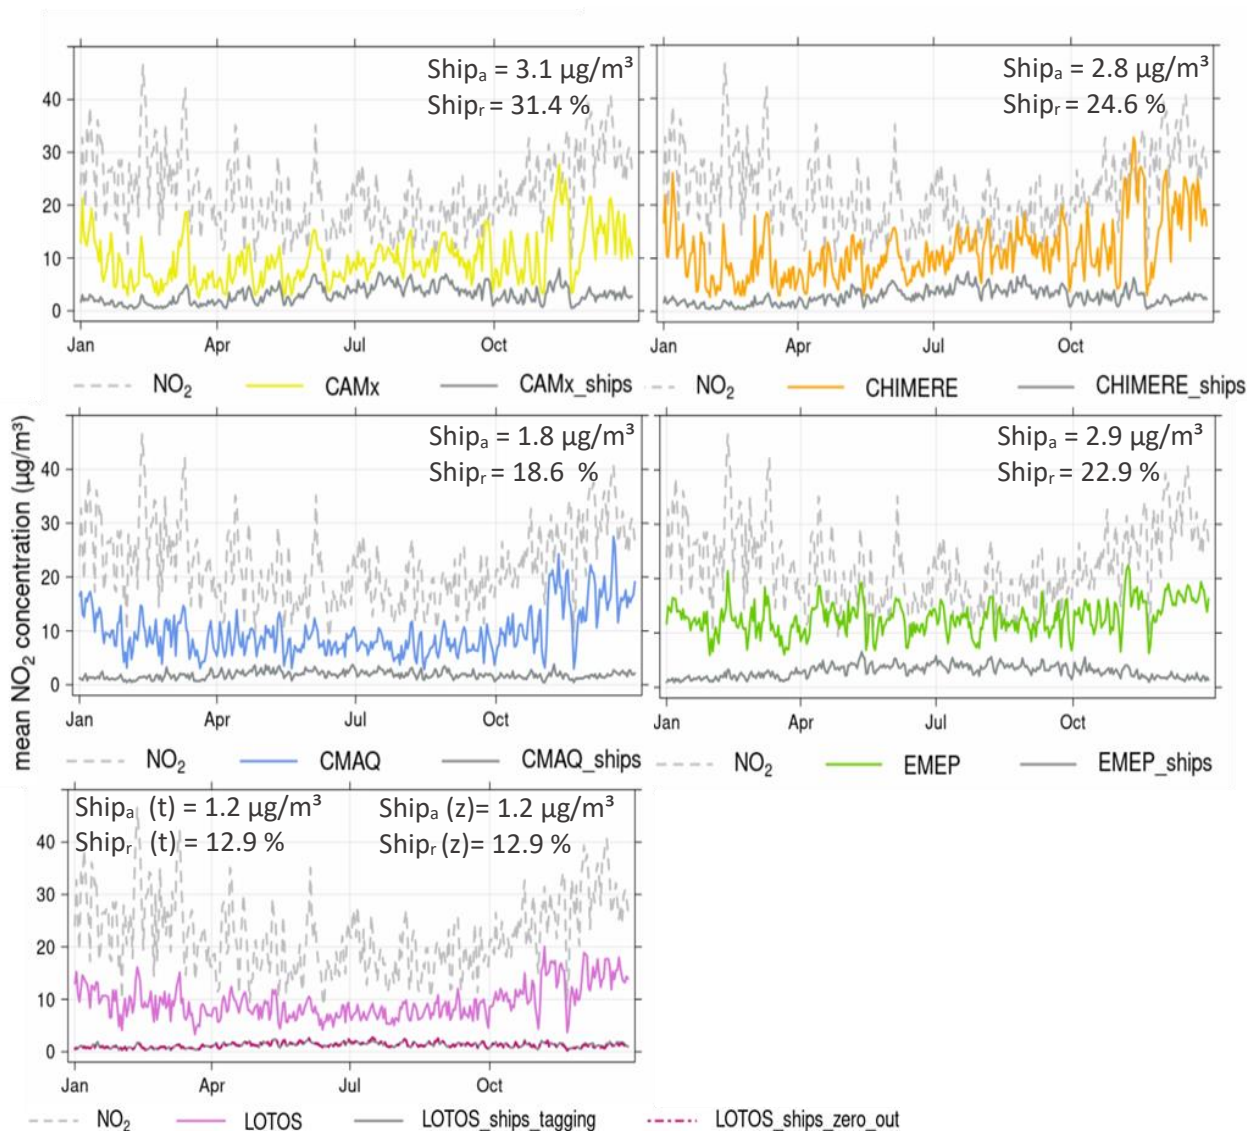

**Figure S2: Time series with daily mean values of NO<sub>2</sub> for 2015 in panel “west”. (a) = CAMx, (b) = CHIMERE, (c) = CMAQ, (d) = EMEP, (e) = LOTOS-EUROS. Dashed grey line = measured data, colored lines = modelled data, grey line = modelled ship contribution. Correlation between modelled and measured data for hourly total emission data for 2015: CAMx: R = 0.23, CHIMERE: R = 0.25, CMAQ: R = 0.2, EMEP: R = 0.23, LOTOS-EUROS: R = 0.26.**

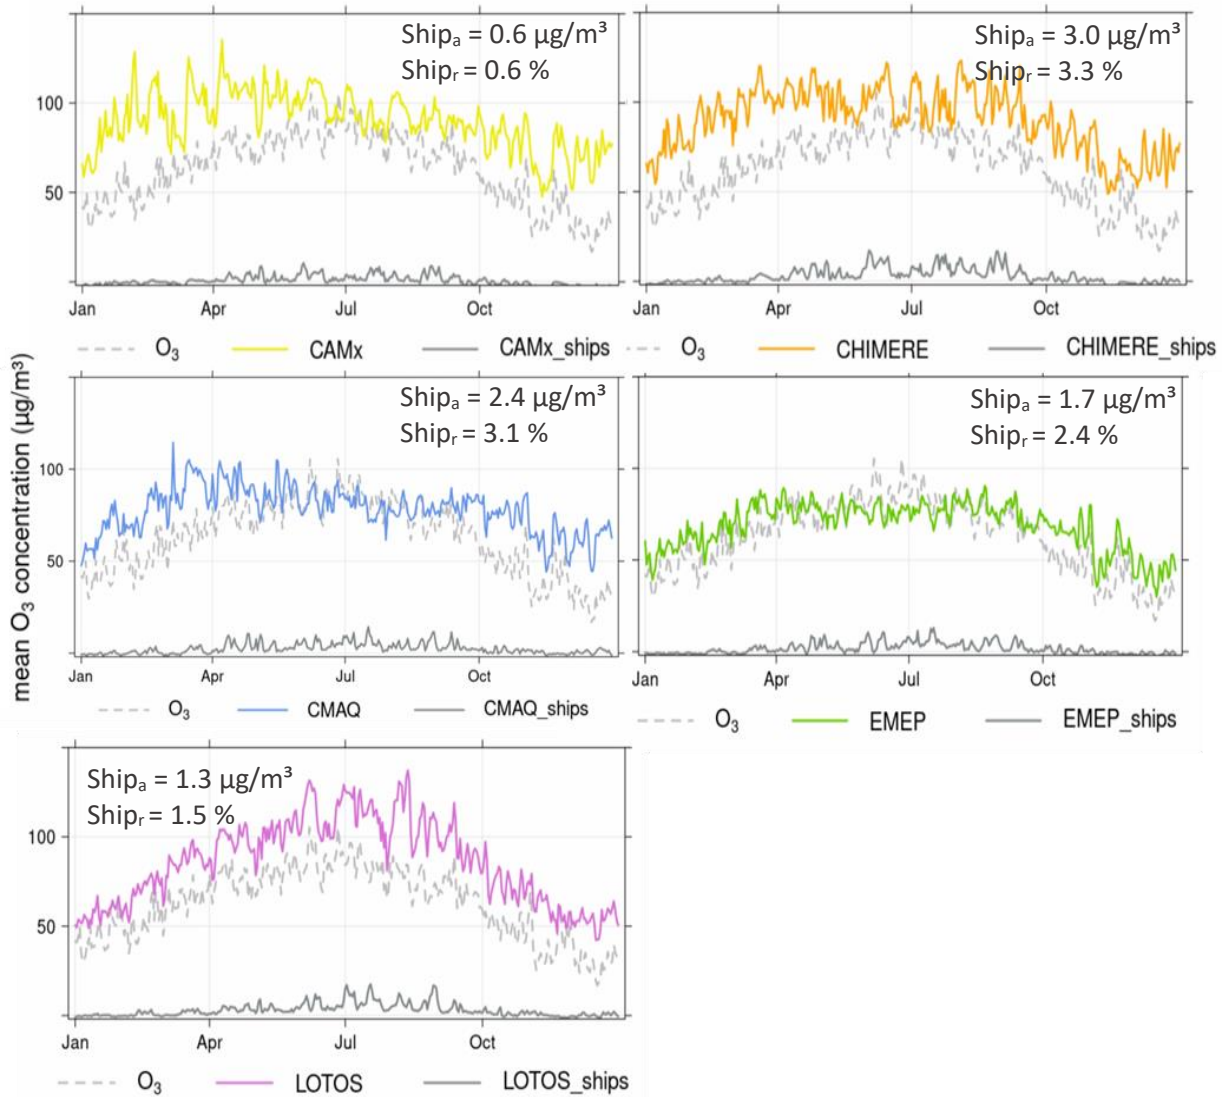

**Figure S3: Time series with daily mean values of  $O_3$  for 2015 in panel "west". (a) = CAMx, (b) = CHIMERE, (c) = CMAQ, (d) = EMEP, (e) = LOTOS-EUROS. Dashed grey line = measured data, colored lines = modelled data, grey line = modelled ship contribution. Correlation between modelled and measured data for hourly total emission data for 2015: CAMx  $R = 0.57$ , CHIMERE  $R = 0.60$ , CMAQ:  $R = 0.58$ , EMEP:  $R = 0.23$ , LOTOS-EUROS:  $R = 0.65$ .**

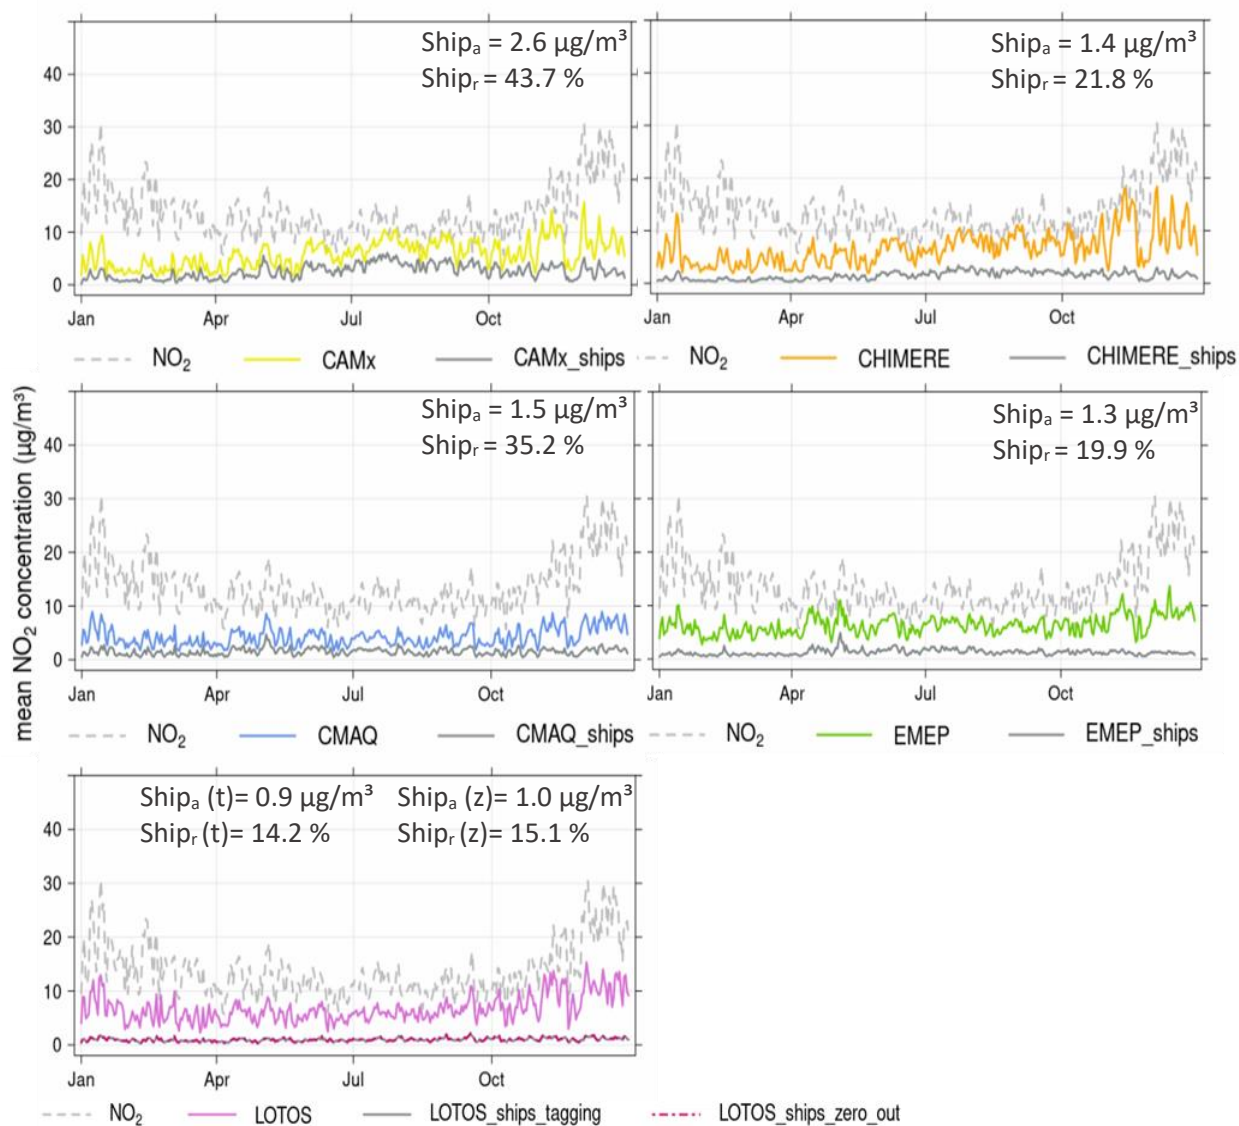

**Figure S4: Time series with daily mean values of NO<sub>2</sub> for 2015 in panel "south". (a) = CAMx, (b) = CHIMERE, (c) = CMAQ, (d) = EMEP, (e) = LOTOS-EUROS. Dashed grey line = measured data, colored lines = modelled data, grey line = modelled ship contribution. Correlation between modelled and measured data for hourly total emission data for 2015: CAMx: R = 0.20, CHIMERE: R = 0.26, CMAQ: R = 0.15, EMEP: R = 0.24, LOTOS-EUROS: R = 0.22.**

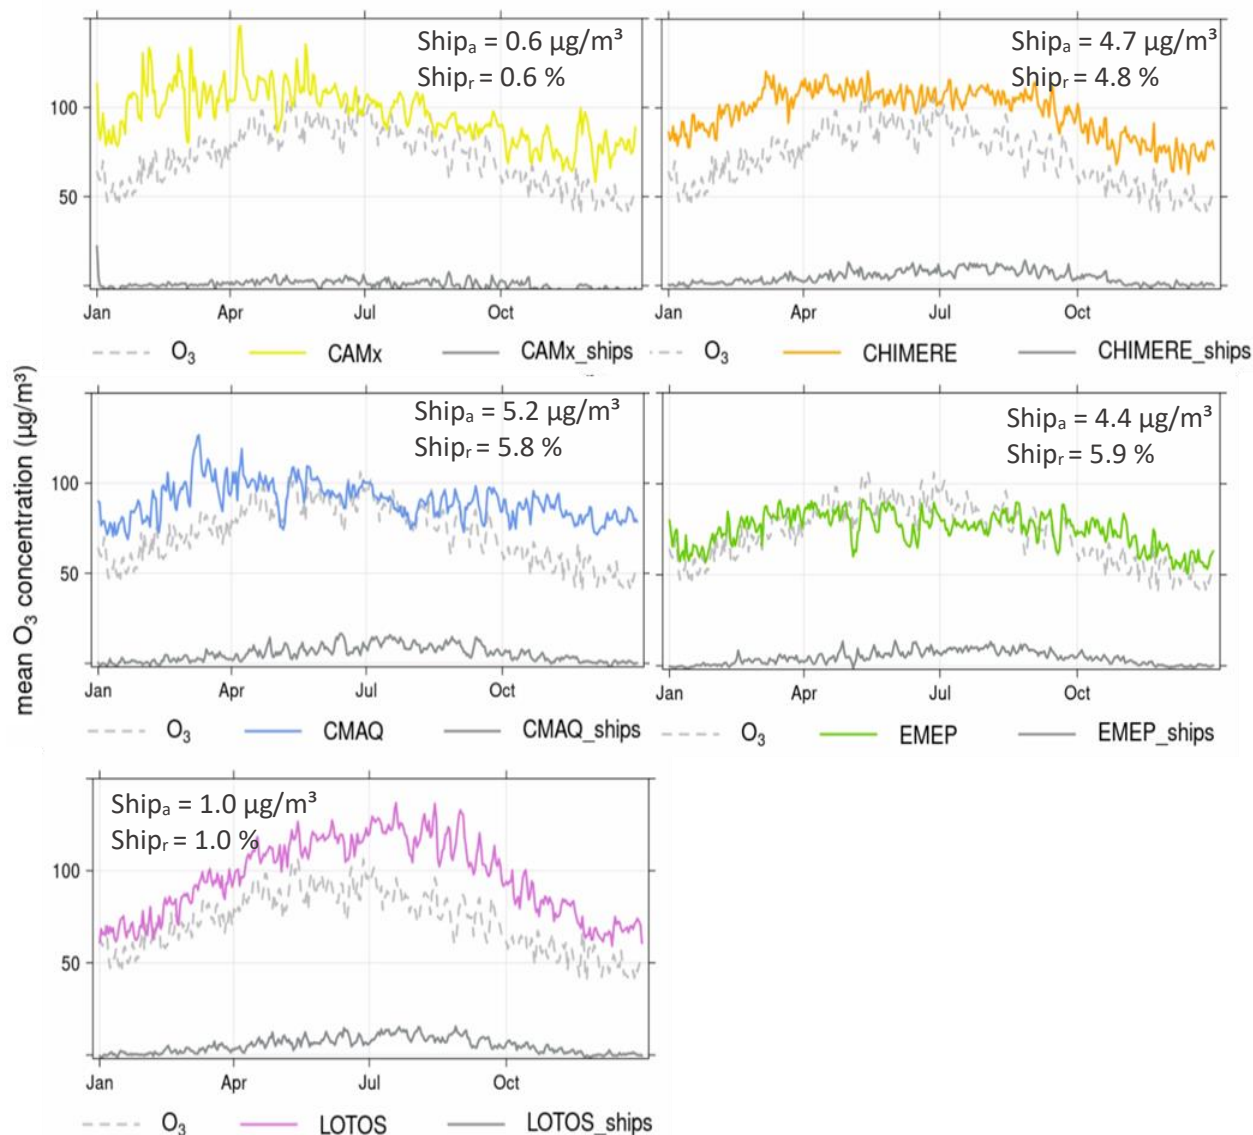

**Figure S5: Time series with daily mean values of  $O_3$  for 2015 in panel “south”. (a) = CAMx, (b) = CHIMERE, (c) = CMAQ, (d) = EMEP, (e) = LOTOS-EUROS. Dashed grey line = measured data, colored lines = modelled data, grey line = modelled ship contribution. Correlation between modelled and measured data for hourly total emission data for 2015: CAMx:  $R = 0.47$ , CHIMERE:  $R = 0.56$ , CMAQ:  $R = 0.44$ , EMEP:  $R = 0.52$ , LOTOS-EUROS:  $R = 0.53$ .**



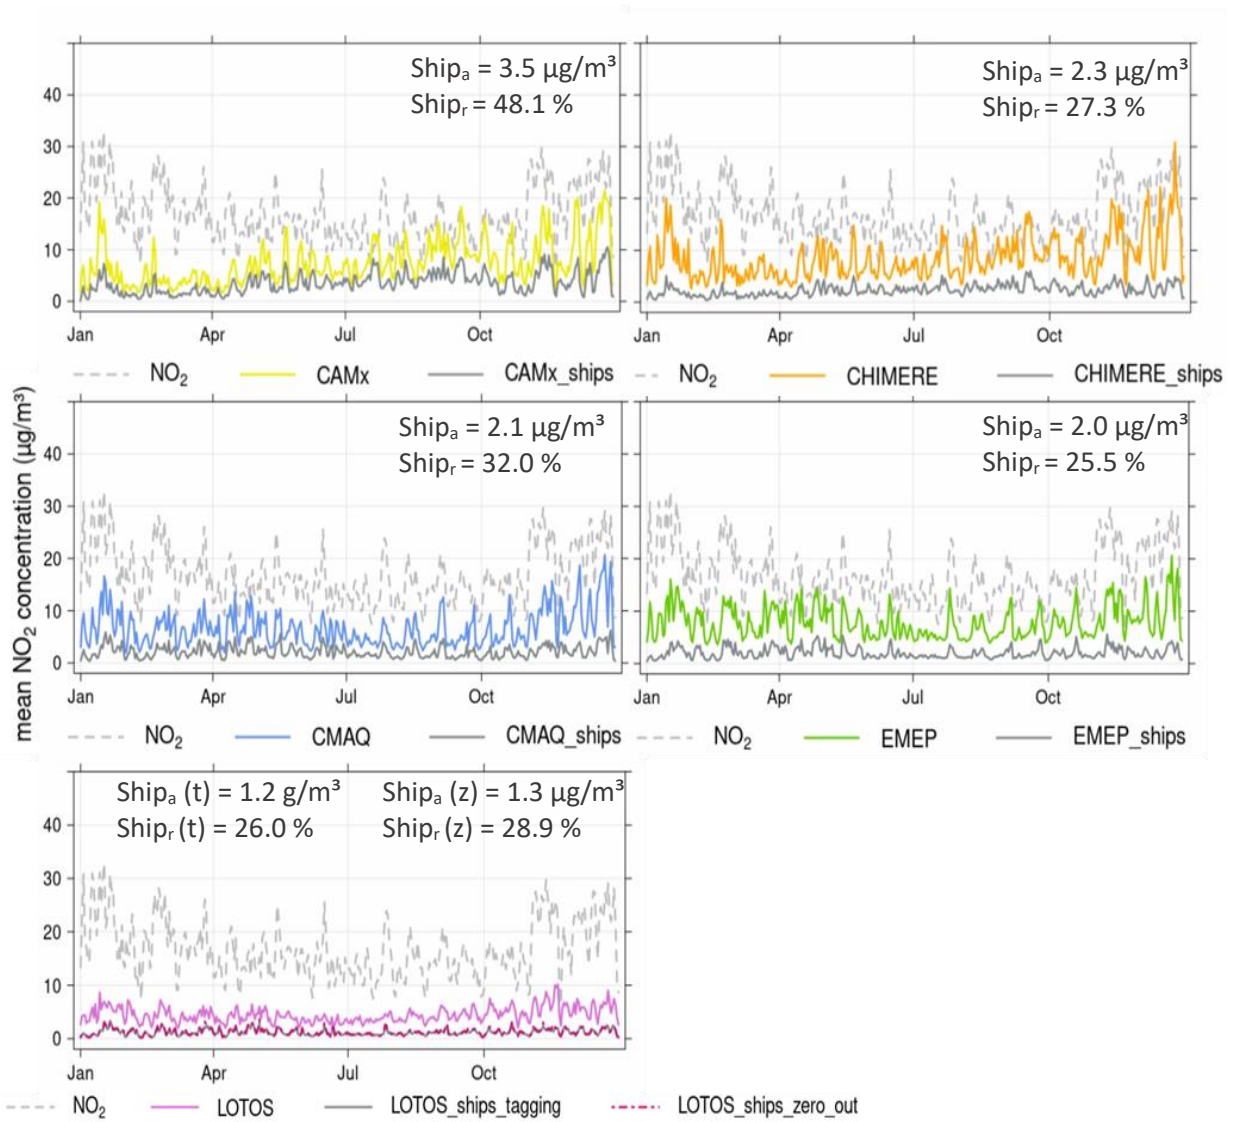

**Figure S6: Time series with daily mean values of NO<sub>2</sub> for 2015 in panel "east". (a) = CAMx, (b) = CHIMERE, (c) = CMAQ, (d) = EMEP, (e) = LOTOS-EUROS. Dashed grey line = measured data, colored lines = modelled data, grey line = modelled ship contribution. Correlation between modelled and measured data for hourly total emission data for 2015: CAMx: R = 0.16, CHIMERE: R = 0.22, CMAQ: R = 0.22, EMEP: R = 0.27, LOTOS-EUROS: R = 0.23.**

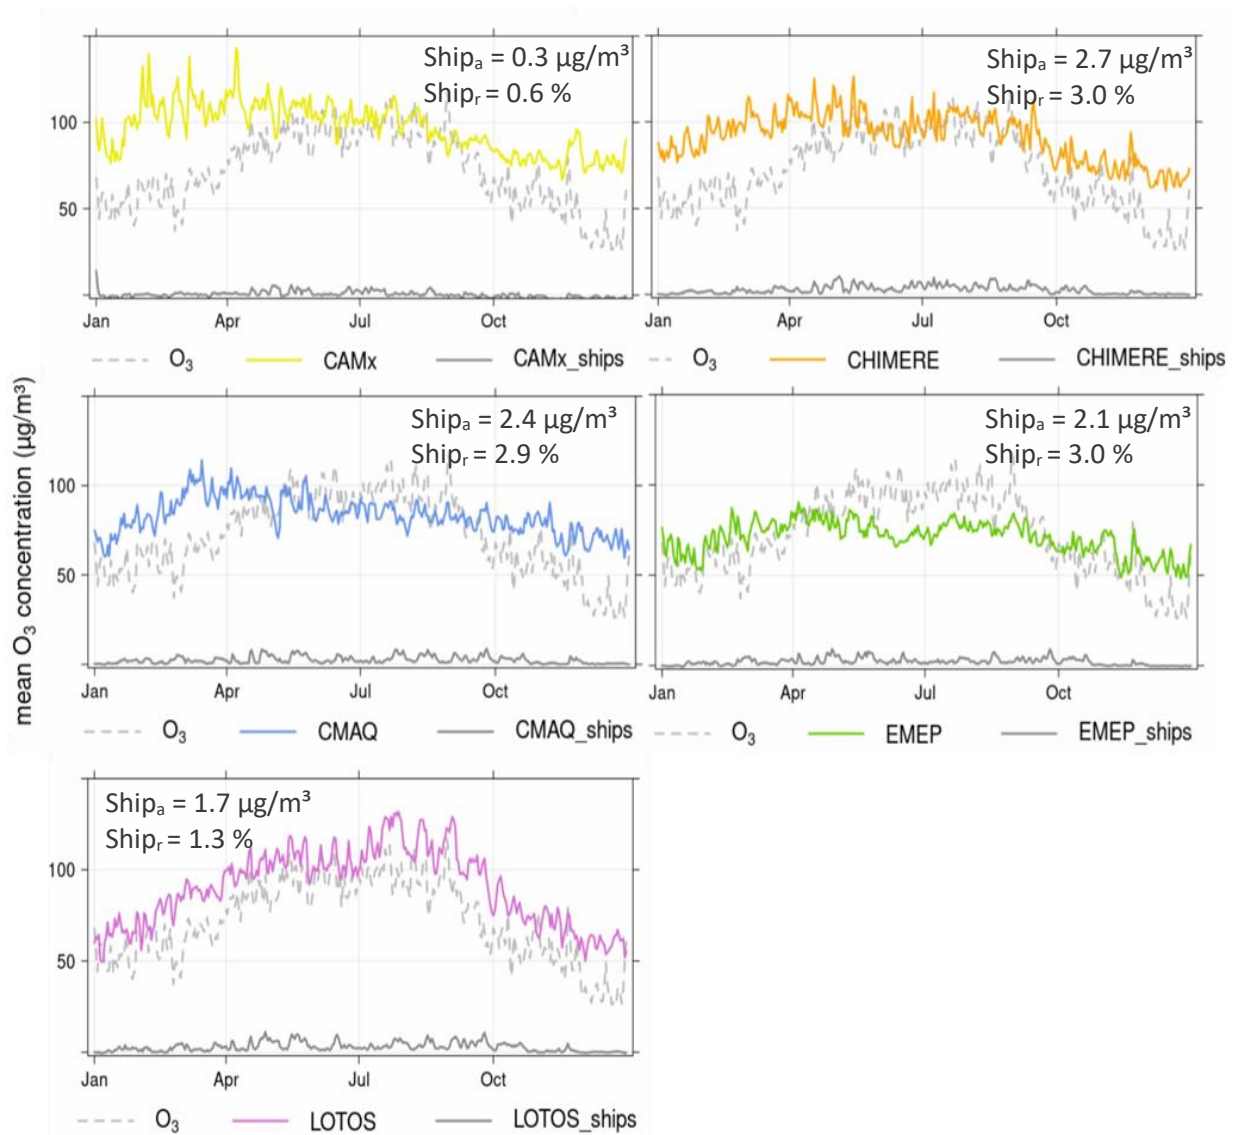

**Figure S7: Time series with daily mean values of  $O_3$  for 2015 in panel “east”. (a) = CAMx, (b) = CHIMERE, (c) = CMAQ, (d) = EMEP, (e) = LOTOS-EUROS. Dashed grey line = measured data, colored lines = modelled data, grey line = modelled ship contribution. Correlation between modelled and measured data for hourly total emission data for 2015: CAMx:  $R = 0.35$ , CHIMERE:  $R = 0.46$ , CMAQ:  $R = 0.37$ , EMEP:  $R = 0.47$ , LOTOS-EUROS:  $R = 0.53$ .**

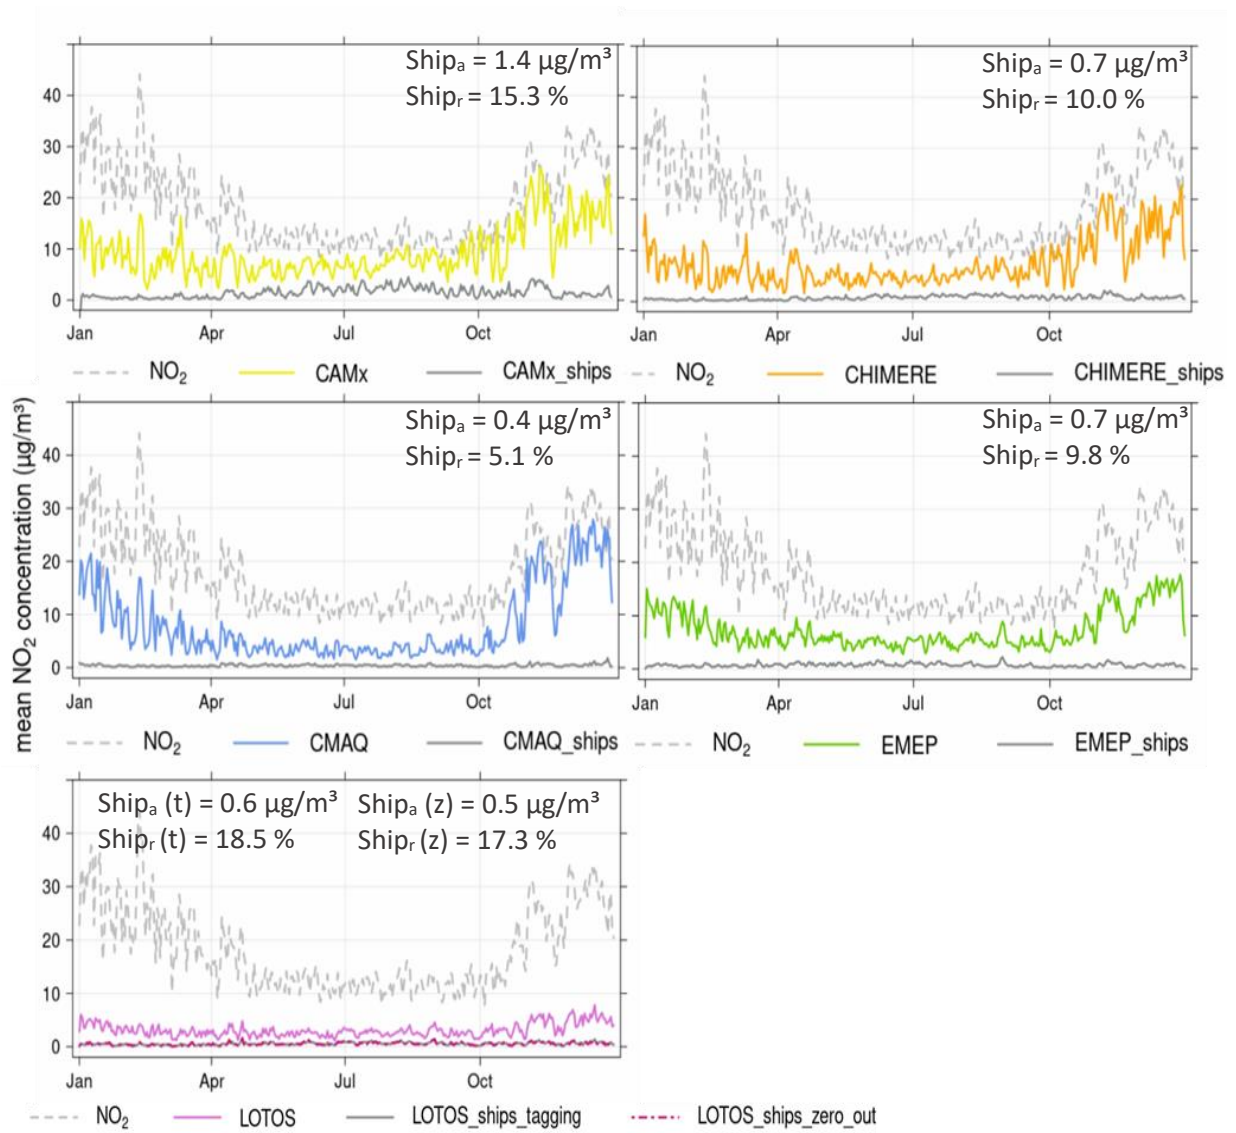

**Figure S8:** Time series with daily mean values of NO<sub>2</sub> for 2015 in panel "north". (a) = CAMx, (b) = CHIMERE, (c) = CMAQ, (d) = EMEP, (e) = LOTOS-EUROS. Dashed grey line = measured data, colored lines = modelled data, grey line = modelled ship contribution. Correlation between modelled and measured data for hourly total emission data for 2015: CAMx: R = 0.27, CHIMERE: R = 0.27, CMAQ: R = 0.34, EMEP: R = 0.36, LOTOS-EUROS: R = 0.26.



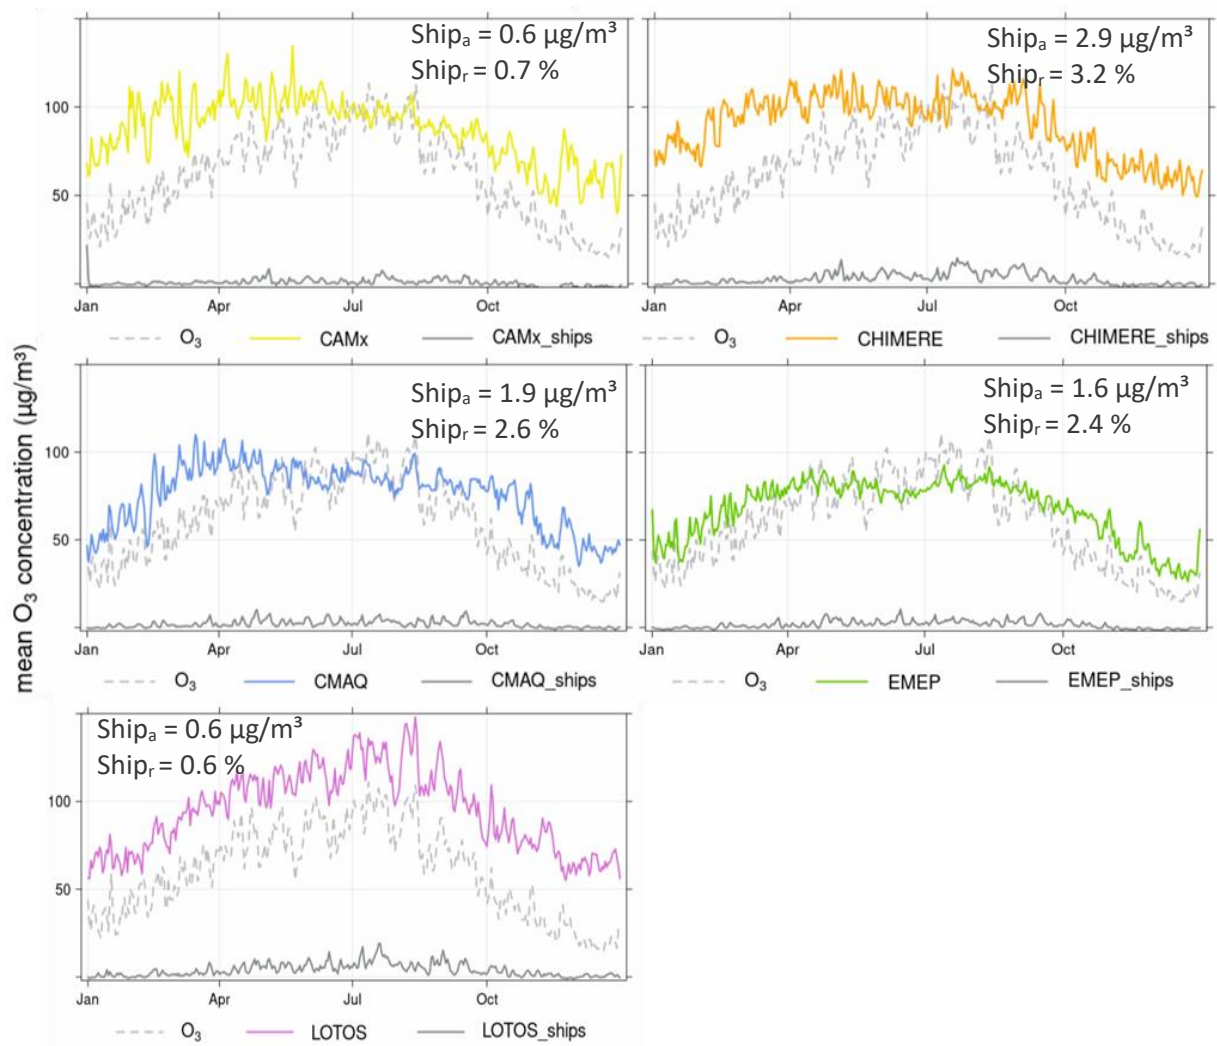

**Figure S9:** Time series with daily mean values of  $O_3$  for 2015 in panel "north". (a) = CAMx, (b) = CHIMERE, (c) = CMAQ, (d) = EMEP, (e) = LOTOS-EUROS. Dashed grey line = measured data, colored lines = modelled data, grey line = modelled ship contribution. Correlation between modelled and measured data for hourly total emission data for 2015: CAMx:  $R = 0.62$ , CHIMERE:  $R = 0.70$ , CMAQ:  $R = 0.64$ , EMEP:  $R = 0.70$ , LOTOS-EUROS:  $R = 0.66$ .
