# Supplementary material for: The contribution of shipping to air pollution in the Mediterranean region – a multimodel evaluation: Comparison of photooxidants NO 2 and O 3
Source: Copernicus journal article supplement (doi:10.5194/egusphere-2022-415), 2022-07-07
Supplement: Supplementary file [file egusphere-2022-415-AC2-supplement.pdf]

The manuscript of Fink et al., 2022, investigates the effect of shipping emissions on NO<sub>2</sub> and O<sub>3</sub> in the Mediterranean Sea. Results of five different models are compared which used the zero-out method. In addition results of the tagging method in LOTOS-EUROS for NO<sub>2</sub> are presented.

The topic of the manuscript is of high relevance as shipping emissions are an important source of pollution in the Mediterranean Sea. In the current state, however, I can't recommend a publication in ACP. To my opinion the following major points need to be adapted:

1) The biggest issue of the manuscript is the used terminology. By definition, contributions can not be calculated by the zero-out method (at least not for non-linear species), but by the LOTOS-EUROS Tagging method. I recommend to use the terminology (e.g. potential impacts and contributions) of the „Source apportionment to support air quality management practices“ from FAIRMODE ([https://fairmode.jrc.ec.europa.eu/document/fairmode/WG3/European%20guide%20SA\\_3.1\\_online.pdf](https://fairmode.jrc.ec.europa.eu/document/fairmode/WG3/European%20guide%20SA_3.1_online.pdf)). The clear terminology is important as the different methods (tagging, zero-out) focus on two different scientific questions. Zero-Out shows the change of e.g. ozone in case of an emission reduction. Tagging gives the contribution to ozone for the 'reference state'. Due to the different aspects of the two methods it is important to have a clear terminology to avoid any misunderstandings. A lot of literature exists on this topic for further reading, e.g.:

Wang et al., 2009, Grewe et al., 2010, Emmons et al., 2012, Butler et al., 2017, Clappier et al., 2017, Mertens et al., 2020, Belis et al., 2021, Thürkow et al., 2021, Rieger & Grewe, 2022

- ➔ The manuscript has been adjusted in terms of terminology, we now use “potential impact” instead of “contribution”. We also removed the part of the manuscript where results achieved with the tagging method were described.
- ➔ We decided to not include the tagging method in the paper. The reasons are that the paper already is very long and that comparing zero-out and tagging was not main focus of this study.
- ➔ The zero-out method is described in more detail on *p51/144*.

2) The paper is very long. The authors tried to explain some of the (large) differences of the model results, but many differences remain unclear.

As an example, the model results for O<sub>x</sub> look very different (e.g. compare EMEP with e.g. CAMx). Also the results for deposition differ largely (as noted by the authors), but there are no further analyses.

On p39/606 the authors note that this could be due to different dry deposition velocities, but the velocities itself are not analyzed. I understand that due to the multitude of effects and the differences between the models itself it is almost impossible to find a reason for the large spread between the models. However, in this case I suggest to reduce the amount of information (e.g. also the length) of the paper by presenting the most important findings only. This could be for example the impacts of the shipping on NO<sub>2</sub> and O<sub>3</sub> as simulated by the different models (and a short chapter to deposition). Also, for example, the time-series of the different models at the different stations (e.g. Figs 2 – 4) are interesting, but also very lengthy. The figures and their discussion could be moved to the supplement and 'only' the summarizing evaluation could be presented in detail.

- ➔ We explain the differences of O<sub>x</sub> by the different boundary conditions for O<sub>3</sub>. O<sub>x</sub> pattern is very similar to O<sub>3</sub> pattern, thus also the differences from the boundary is reflected. EMEP (and CMAQ) have a lower concentration of O<sub>3</sub> coming from the eastern and southern part compared to CAMx. Further explanation was added to the manuscript and can be found: *p32/651*

- ➔ Information on deposition velocities are included and figures of deposition velocities are in the Supplements  
(Explanations: *p36/689; p39/725*. Figures in Supplements: *S18, S19*)
- ➔ Timeseries are now moved to the appendix (*Appendix C; Appendix D*)

In addition, I suggest to better highlight/focus on what we can learn from a policy point from this study? Where are open questions? What did you learn from the multi-model study which should be considered in follow up studies? Should more things be harmonized? Where do models need to be improved?

- ➔ These questions are important to answer in the conclusion, you can find the answers in the last part of “6 Summary & Conclusions” (*p43/44*)
  - As policy point of the study we would see that the size of the uncertainty of single models should be considered and a model ensemble (usage of several models) could help.
  - Open questions are the potential impacts of shipping to aerosol particles and wet deposition (this is the next step of the current intercomparison study), but also detailed comparison of vertical structures and mixing of pollutants in higher layers
  - The present study has shown us possible limitations, over- and underestimations of model simulations. Limitations were traced back to the large grid sizes and the treatment of dilution of the emitted air pollutants. In addition, model-specific mechanisms lead to differences in simulation outputs.
  - Harmonization of all data was not the goal of the present study. Nevertheless, emissions were harmonized to exclude the source of uncertainty coming from emission input dataset. This was done to shed light on what other factors lead to the differences.

3) I like the idea that the different models were applied in their ‘default configuration’ and only resolution and anthropogenic emissions are prescribed. However, the description of the models differ strongly in their level of detail. Some examples:

- For CAMx no information about the biogenic emissions are given;
- Information about sea salt emissions are only given for CMAQ, EMEP and CAMx;
- Information about dust emissions are only given for CMAQ and EMEP.

Similarly, the description of dry- and wet-deposition differs (for example EMEP in Sect 2.1, for all other in Sect 2.4). Information about lightning NO<sub>x</sub> are missing completely.

- ➔ The information are adjusted and missing information was added  
(see *Section 2.1*)
- ➔ Regarding the deposition mechanism it is all described in *Section 2.4 (p13)*

I suggest to give the same amount of information for all models in the same level of detail. I would also suggest to expand Table 1 with details about the chemical mechanism, the used dry deposition scheme, biogenic emissions etc.

- ➔ Table 1 is expanded, this indeed helps to get a better overview  
(Table 1 on *p5/p6*)

Finally, I further suggest to add tables with total emissions (especially for biogenic sources) for each model to the supplement. It would also be nice to see all computational domains in the supplement.

- ➔ There are no tables included for the emissions, since they are partly calculated on-line (i.e. biogenic emissions in CHIMERE or LOTOS-EUROS). Furthermore, this would extend the manuscript even more.
- ➔ Computational domains are added to the Supplements (*Supplements S1*)

In addition, I noticed that for all models the figures for NO<sub>2</sub>, O<sub>3</sub> etc. (e.g. Fig. 7) show slightly different geographical regions. This contradicts with Fig. 1 and the information about a common domain. As example, Fig 7 (e) does only partly show the Po Valley while Fig. 7 (b), (c) and (d) show the Po Valley completely. For better comparability the same geographical region should be displayed for all models (and of course should be used for calculating mean values, frequency distribution etc.)

- ➔ The geographical region was adjusted and now displays the same region for all models. By correcting the region, the following things changed:
  - Number of measurement stations and therefore all the calculations (slightly) changed, which are connected to the stations (R, NMB etc)
  - Calculations between models were repeated due to the adjusted domain. Results of model intercomparison changed.

4) I suggest to replace the color scales. The rainbow color scale can be misleading. In addition it is problematic for people who are colorblind. You can check your plots for example with a 'CV Simulator' on you phone. Also some of the labels at the figures are very small. I suggest to use at least the same font size as in the figure caption.

- ➔ the color scale is changed in all maps, also the font size is larger now.

Minor comments:

p6l155: Is there something missing in this sentence (boundary conditions from Mozart44 output were activated?). But more importantly, if CAMx OSAT output is available why not discuss this in the manuscript? To my opinion the paper would benefit from including OSAT results.

- ➔ We left out the part of the sentence where PSAT and OSAT are described because we did not consider the PSAT or OSAT results in the present study (p7/163)
- ➔ Unfortunately, the OSAT output is not available

P8l233: I am not familiar with LOTOS-EUROS, but does this mean that the model time step is 1 hour or should it read 'hourly model output' ?

- ➔ Maybe "hourly model outputs" fits better here for understanding (p10/259)

p10l257: This does mean that the NMVOC split was not adjusted to the chemical mechanisms of the individual models, right? No lumping of species were performed?

- ➔ We changed the description to clarify the explanation on p12/290

P10l264f: The part about the VOC emissions is unclear to me. Please rephrase. Thanks!

- ➔ We modified the explanation on p12/299
  - The four groups are based on how different VOC emission factors change as a function of the engine load. For example: Emission factors for VOCs in group B decrease as the engine load increases, but for VOCs in group D the emission factors will increase as the engine load increases. By dividing VOCs into these four groups, we don't have to model all species separately, but can only create emission maps for the four groups. Emissions of individual VOC species can be calculated from these emission maps. This saves computational resources needed for the modelling exercise.

P20l402: You mention the longer lifetime of NO<sub>2</sub> for CAMx and CHIMERE. I wondered if HNO<sub>3</sub> mixing ratios of the models differ. Please add figures in the supplement and discuss them shortly.

- ➔ We added the HNO<sub>3</sub> concentration and the HNO<sub>3</sub>:NO<sub>2</sub> mixing ratio figures in *Supplements S11 and S12*)
- ➔ A short discussion concerning HNO<sub>3</sub> can be found on p19/448
  - We would expect a lower HNO<sub>3</sub> concentration for models with longer lifetime of atmospheric NO<sub>2</sub>. We also decided to normalized the data by using the HNO<sub>3</sub>:NO<sub>2</sub> ratio. Especially along the main shipping routes differences are displayed. There, values are lower in CAMx and EMEP compared to the other models. We explained it by the lower HNO<sub>3</sub> formation by these models along the shipping routes.

Fig 6: Please don't use the tagging results for calculating mean impacts. Tagging and zero out give something different (see main point 1).

- ➔ We decided to not include the tagging method in the paper. The reasons are that the paper already is very long and that comparing zero-out and tagging was not main focus of this study.

p24l448: See also (1) – To my opinion the main reason zero-out gives different results (and results from different sensitivity simulations do not add up) is the non-linearity of the chemistry. Of course other factors also lead to differences.

- Yes, the non-linearity is one major point. Nevertheless, as we decided to not include tagging any more in this study, this point will be left out.

P261495: Please provide figures of the different boundary conditions in the Supplement.

- We included information about the boundary values in the lowest model layer in the *Supplements S13 to S16*.

P321516ff: I don't understand this sentence. How should a split of the emissions lead to high concentrations over sea and low concentrations over land? I guess the main reason is the low dry deposition over sea, right? (as well as the overall higher land emissions).

- We changed this sentence to make it more clear on *p28/577*

Figure 18: The label for the subplot should be contribution frequency distribution? Please check also for all other figures.

- We decided to not include the labels for frequency subplots to not overload the plots

P461679ff: Please see main point (1) above. There is also a lot of literature discussing zero out vs. tagging which could be cited here.

- No longer needed since tagging is no longer included (see above)

P471691: Is there any answer on the question of and how the different dry deposition can explain the model differences?

- A connection can be seen between a high concentration and low deposition when the deposition velocity is low. This indicates that the substance stays longer in the atmosphere (i.e. CHIMERE). On the other hand, if the deposition rate and deposition are high, the concentration is lower (i.e. LOTOS-EUROS). (*p43/783*)

Technical comments:

I found some typos and missing spaces etc. Please double check the manuscript. Some examples:

p3188 differences, p41103 % by

p131334 – Should be Table 3?

p361580ff (and throughout the whole manuscript): I suggest to replace 'output' with model results or similar

- It is replaced by different terms

p461661: The output was quantified? I guess it should read the differences of the model results was quantified or the impact of shipping simulated by the different models was quantified.

- Now the sentence says: "The model simulations were evaluated by comparing the simulated data against the measurements [...]" (*p42/746*)

P461673: the maps display – In my opinion the model results display (please check also the manuscript for similar wording as the term 'maps' have been used quite often)

- It is adjusted and other terms are being used
